# Supplementary material for: SmSak, the Second Polo-Like Kinase of the Helminth Parasite Schistosoma mansoni: Conserved and Unexpected Roles in Meiosis
Source: PubMed Central journal article supplement (PMC3386946; doi:10.1371/journal.pone.0040045), 2012-06-29
Supplement: pone.0040045.s001.pdf [file pone.0040045.s001.pdf]

**A**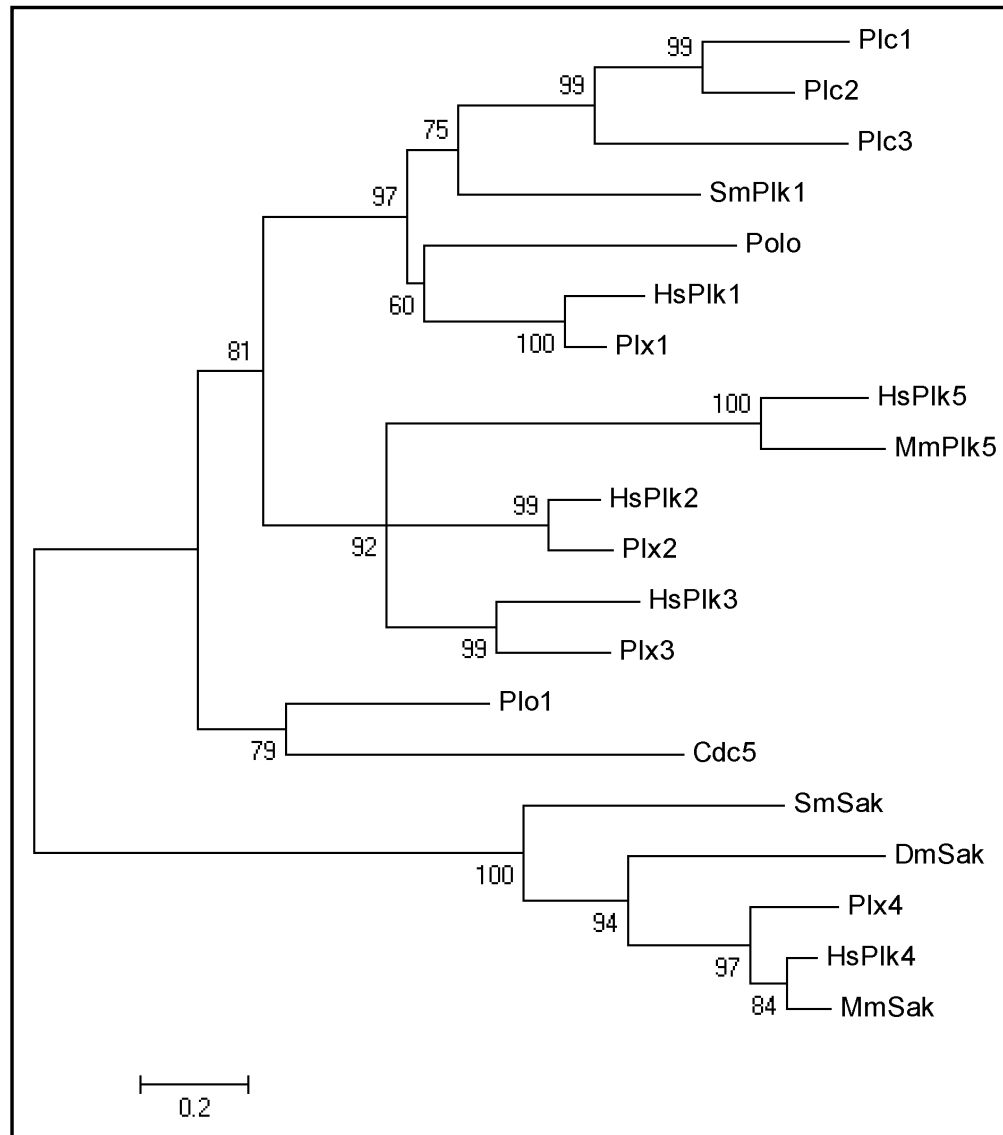**B**

|                      | Organisms              | Polo-like kinases | GenBank Accession N° |
|----------------------|------------------------|-------------------|----------------------|
| <b>Yeast</b>         | <i>S. pombe</i>        | Plo1              | CAB11167.1           |
|                      | <i>S. cerevisiae</i>   | Cdc5              | P32562               |
| <b>Invertebrates</b> | <i>C. elegans</i>      | Plc1              | P34331.3             |
|                      |                        | Plc2              | Q9N2L7.1             |
|                      |                        | Plc3              | Q20845.1             |
|                      | <i>D. melanogaster</i> | DmPolo            | P52304.2             |
|                      |                        | DmSak             | AAF51737.1           |
|                      | <i>S. mansoni</i>      | SmPlk1            | AAV49163.1           |
| SmSak                |                        | ADB12549.1        |                      |
| <b>Vertebrates</b>   | <i>X. laevis</i>       | Plx1              | P70032.1             |
|                      |                        | Plx2              | NP_001079435.1       |
|                      |                        | Plx3              | AAL30176.1           |
|                      |                        | Plx4              | NP_001083146.1       |
|                      | <i>M. musculus</i>     | MmSak             | AAC37648.1           |
|                      |                        | MmPlk5            | Q4FZD7.1             |
|                      | <i>H. sapiens</i>      | HsPlk1            | NP_005021.2          |
|                      |                        | HsPlk2            | NP_006613.2          |
|                      |                        | HsPlk3            | NP_004064.2          |
|                      |                        | HsPlk4            | NP_055079.3          |
| HsPlk5               |                        | NP_001230008.1    |                      |
