# Supplementary material for: SmSak, the Second Polo-Like Kinase of the Helminth Parasite Schistosoma mansoni: Conserved and Unexpected Roles in Meiosis
Source: PubMed Central journal article supplement (PMC3386946; doi:10.1371/journal.pone.0040045), 2012-06-29
Supplement: pone.0040045.s002.pdf [file pone.0040045.s002.pdf]

**GxGxFA**  
 SmSak MDVDPETSFTVSKFHTDFQVFE LLGRGGFAQAYRAKSTITGQEVAIKMI DKKGM LQHLANRVRREVEIHSRLKHPSILELYTCFEDENYVYLVEI CHNGELQTYIRQN-GPVTEDTARHYLKQLISG 129  
 hPlk4 -----MATCI GFKIE DFKVG NLLGKGSFAGVYRAES IHSGL E VAIKMI DKKAM YKAGMVQRVQNEVKIHCQLKHPSILELYNYFEDSNVYLVLEMCHNGEMNRYLKNRMKPFSENEARHFMHQIITG 123  
 MmSak -----MAACI GERIE DFKVG NLLGKGSFAGVYRAES IHTGLE VAIKMI DKKAM YKAGMVQRVQNEVKIHCQLKHPSILELYNYFEDSNVYLVLEMCHNGEMNRYLKNRMKPFSENEARHFMHQIITG 123  
 Plx4 -----MAGSI GERRE DFKVL NLLGKGSFACVYRAQS INTGIDVAIKMI DKKAM QKVG MVQRVQNEVKIHCQLKHPSILELYNYFEDSNVYLVLEMCHNGEVNRYLKNRKRKPFSEDEARHFMHQIVTG 123  
 DmSak -----MLSNRAFGETIE DYEVQ HLLGKGGFATVYKARCLHTHQDVAIKMI DKKL LQGTGLTNRVRQEV E IHSRLKHPSVLELYTFEQDANYVYLVELELAHNGELHRYMNH IARPFTE TEAASILKQVVAG 125

**HRDLxLxN**      **DFG**      **GTPNYIxPE**  
 SmSak LLYLHSHNIIHRDLTIANLLTKDMKVKIADDFGLATKIE-EGEDHKTMCGTPNYISPEVASHNQQGLETDVWSLGCMFYTLIVGHPPFDTRVRSFLNRLVAVDYELFSTLSAEAADLINSLLRREPOER 258  
 hPlk4 MLYLHSHGILHRDLTSLNLLTRNMNIK IADDFGLATQLKMPHEKHHTLCGTPNYISPEIATRSAHGLSDVWSLGCMFYTLIIIGRPPFDTRVKNFLNKVVLADYEMPTFLSIEAKDLIHOQLLRNPADR 253  
 MmSak MLYLHSHGILHRDLTSLNLLTRNMNIK IADDFGLATQLNMPHEKHHTLCGTPNYISPEIATRSAHGLSDVWSLGCMFYTLIIIGRPPFDTRVKNFLNKVVLADYEMPAFLSREACDLIHOQLLRNPADR 253  
 Plx4 MLYLHSHGILHRDLTSLNLLSSDMNIK IADDFGLATQLKMPNEKHHTMCGTPNYIAPETATRSAHGLSDVWSLGCMLYTFIVGRPPFDTRVKNFLNKVVLADYEMPTDFVSREAKDLIFOLLRKNPADR 253  
 DmSak LLYLHSHNIMHRDISLSNLLSREMHVKIADDFGLATQLKRPDERHMTMCGTPNYISPEVVSRTSHGLPADVWSVGCMLYTLIVGRPPFDTRAVQSTLNKVVMS EYIMPAHLSYEACDLINKLLKKLPER 255

SmSak LKLIKAIIOHPFM LKKS R PQRHMKTSNDSGIDSIYRTPGLYLSNSLKSHHLRKKVKNESNTHPCNTFISIAISD-----TQCDSIPIYFLASAPQLSHAVTSDWDP SIN V 361  
 hPlk4 LLSLSSVLDHPFMSRNSSTKSKDLGTVEDSIDSGHATISTAITASSSTISGSLFDKRRLLIGQPLPNKMTVFP-KNKSSDFSSSDGNSFYTQWGN--QETSNSGRGRV IQDAEERPHSRYLRRAYSSD 380  
 MmSak LLSLSSVLDHPFMSRNPSPKSKDVGTVEDSMDSGHATLSTTITASSGTSLSGSLD-RRLLVGQPLPNKMTVFP-QKNKSSDFSS-GDGSNFTQWGNPEQEANSRGRGRVIEDAEERPHSRYLRRAHSSD 380  
 Plx4 LLSLSSVLDHAFMFGFSNVQSKVMGAVEDSMDSGHATISTGFTGSSGVSISGRFQE-KRILSGPSPNKNVNI FQFKDKHPTERSN--GGSFHNTQREN--NDFSENGRKPVACEDRPHSRYLRRAHSSD 377  
 DmSak ITTEAVLCHPFMLKCSNG-----GHSAPGALNVS-----QSMESGDSGITTFAS--SDSRNSQQIR SVE 313

Degron motif

SmSak HADVQRPTQLNTP-----NIRQTCYSDGAFEQRSRVSFSQVSDSEIKKSLLSHRNQLVNSTVTRAHNNLS-----G 428  
 hPlk4 RSGTSNRQSQAQTYT-MERCHSAEMLSVSKRSGGGENEERYSPDTNANNI FNFFKEKTS SSSSGSFERPDNNQALSNHLCPGKTPFPFADPTQPTETVQQWFGNLQINAHLRKTEYDYSIS-PNRDFQGHF 508  
 MmSak RASPSN-QSRAKTY S-VERCHSVEMLSKPRRS-----LDENQHSSNHCLGKTPFPFADPTQPMEMVQQWFGNLQMNALHGETNEHHTV S-PNRDFQDYP 472  
 Plx4 RSGTSQSQTYAKPSSYSERCHSVEMLAKPHTHLG----YRTSSPPNSYGDIPQMFTDERSLERHTSPPVKEKTPSEFMGPAKQATAPRSND--KAE TVQQWF GAMQLNGQFKNTPDTSVSNMGGDFYSQQ 501  
 DmSak NSGFPQ-----VLPQITREEFKQVHHKLPYEQTGLFGQAS----- 347

SmSak PSLFSPSHPTATVIKTOHADGVKGN TNIS-----KSELSSNSIS-----KPELTHPLPINTFR LKPMRYTRILAVINILQDESVCLEFLGSSAKTRQNTSVI 522  
 hPlk4 DLQKDTSKNAWTDTKVKNSDASDNAHSVKQNTM KYMTALHSKPEIIQQECVFGSDPLSEQSKTRGM EPPWGYQNTLRISITSPVAHRLKPIRQKTKKAVVSIIDSEEVQVELVKEY--ASQ EY---- 632  
 MmSak DLQ-DTLRNAWTDTRASKNADTSANVHAVKQLS AMKYSAHHHKPEVMPQE--PGLHPHSEQSKNRSMESTLGYQKPTLRISITSPVAHRLKPIRQKTKKAVVSIIDSEEVQVELLREC--ASEGY---- 593  
 Plx4 ATQNGAPQYAWNDVKKRKN TSSLESVLLG-----IKKNPGTGQRK--AEKSQFGEQSKSR--VPQQAFGSSTLRSIISPLNAERLPIRQKTKNAVVSIIESGEVCFLEQ--NSQER----- 611  
 DmSak ---TGLAEPNWPG--AAKSSAFCMEAGNVP-----NSKQASLKED-----RISVPP LNTKRLPTRKTKNAIIMSILRNGEVVLEFLKFRPTYNEDR---- 429

SmSak KGSQNLRWVVMGINNTGONLIIYRPNMGKGVPLNVQGLGDSSQTNLANSETMNFSGPPASEGDPLEFYTLNLTLPQKYWRKYCFISKSVOMVRAHTPKVTLYTDKVKCMLMENGPSGDFVTFHNDGIR 652  
 hPlk4 -----VKIVLQISSDGNITITTYYPNGRGRFP LAD-----RPP--SPTDNISRY SFDNLEEKYWRKYQYASRFVQLLRSKPKIT YFTRYAKCILMENS PGADFEVWFY-DGVMK 732  
 MmSak -----VKIVLQISSDGMITVYYPNDGRGRFP LAD-----RPP--LPTDNISRY SFDNLEEKYWRKYQYASRFIQLVRSKTPKIT YFTRYAKCILMENS PGADFEVWFY-DGAK 693  
 Plx4 -----VKIVLRLISCDGNLIYVYHPNEGKGFPLVD-----RPP--SPPENRLSYTFDSLBEKYWRKYQYAAKFIKLVRSKTPKVITYYTRYAKCILMENSPTADVEVCFY-DGAK 711  
 DmSak -----INVICRISDDGQRILIIYQDPGRGLEVRE-----QPPDLQIPSGDCVNYNDNLPSKHWKYYIYCARFVGLVKS KTPKVITYFSTL GKQLMETMT--DFEIRFY-SCAK 529

SmSak VLCTSDGSLRISQTEQNNSLKVKENITPTITLDSNRSLSTLSPEIRKLIIDYVYACRDRCKIEOLLARM DSEENDT SVLSCSSFFVILGHRPKIGFNLVTS-----SQNHPKPTSVTNMITNELG 774  
 hPlk4 IHKT-EDFIQVIEKTGK-----SYTLKSESEVNSLKEIKMYMDHANE GHRICLALESIIS----EEERKTRSAFFPIIIGRKPSTSSPKALSPPPSVDSNYPTRDRASFRNMVMHSDA 843  
 MmSak IHKT-ENLIHIIEKTGI-----SYNLKNEVEVSLKBEVKVYMDHANE GHRICLSLESVIS----EEEKRSRGSFFPIIIGRKPSTSSPKALSAPP-VDPSCCKGEQASARLSVNSAA 803  
 Plx4 IHKT-SDVIRVIEKSGR-----SYTLKSESEVNSLKEIKMYMDHANE GHRICLSLESAIN----TEEKGENISLFPITFGRRPALAESPKTQPTPSVDSARERKEQSYVNRVHLGSA 821  
 DmSak LLKTPSEGLKVYDRNG-----MLLSDYSCS----ESRSLIEHGNECFTHCVNISALE-----VAQTKDN--SCFFVTIIGRRPITDVQF-----AQRLDGLRDTNIAFSTPK 621

SmSak DQVSI.SSQIYNI.TSDCI.KEKYKNP LSEN-----QAKHORI.PTNAV FVFNVGWASQFSDDRLOVQFNDGAKI.IIVYNRITLVYAIFHSAPPEFTDQELPKRYVYNTSDPI.PEHTYRRIEVMPTVIKQIR.T 896  
 hPlk4 SPTQAPIILNPSMYVNEGLGLTTASGTDISSNSLKDLPKSAQLLKS VFKVNGWATQLTSGAVVQFNDGSQLVVOAG-VSS--ISYTSFNG-----QTRRYGENEKLPEYIKQKLOCLSSILLMFSN 964  
 MmSak FPTQSPGLSPSTVTVVEGLGHTATATGTGVSS-----LPKSAQLLKS VFKVNGWATQLTSGAVVQFNDGSQLVVOAG-VSS--ISYTSFNG-----QTRRYGENEKLPEYIKQKLOCLSSILLMFSN 919  
 Plx4 SPPQMPNLNPSLISYDGSVFSALTIVQPSPTSIHNH-TPDHAQVLSK VFNVGWASQNSGAVVQFNDGSQLVVOAG-VSS--IITYAENG-----QTRHGENDKLPEYIKSKLOCLSSILLMFSN 940  
 DmSak SNQGSINFSLSTISST---RNTSDFGTNCSRS--NMLAAHQNIPIKRIINVEPEIGATELSHG VVOVQFNDGSSVVSIP S-MOGGGLIYQFNG-----TSIFHGKGDLEFPVRDRVQIPNIQLKLT 739

SmSak VAN-----KIIS---- 903  
 hPlk4 P-----TPNFH---- 970  
 MmSak P-----TPNFQ---- 925  
 Plx4 S-----SSR----- 944  
 DmSak APLLGSRKTDYNNAMPKTTIPYYNRMLL 769

\* \* \* \* \*  
 \* \* \* \* \*  
 \* \* \* \* \*  
 \* \* \* \* \*  
 \* \* \* \* \*
